## Moving outside the lab: The viability of conducting sensorimotor learning studies online

Jonathan S. Tsay<sup>1,2</sup>, Alan S. Lee<sup>1</sup>, Richard B. Ivry<sup>1,2</sup>, Guy Avraham<sup>1,2</sup>

<sup>1</sup>*Department of Psychology, University of California, Berkeley*

<sup>2</sup>*Helen Wills Neuroscience Institute, University of California, Berkeley*

### Corresponding author Information:

Name: Jonathan Sanching Tsay

Email: [xiaotsay2015@berkeley.edu](mailto:xiaotsay2015@berkeley.edu)

Address: 2121 Berkeley Way, Berkeley, CA 94704

**Keywords:** Motor learning, Online Experiments, Crowdsourcing, Visuomotor Adaptation

### Abstract

Collecting data online via crowdsourcing platforms has proven to be a very efficient way to recruit individuals from a large diverse sample. While many fields in psychology have embraced online studies, the field of motor learning has lagged behind. We suspect this is because of an implicit assumption that the loss of experimental control with online data collection will be problematic for kinematic data. As a first foray to bring motor learning online, we developed a web-based platform to collect kinematic data, serving as a template for researchers to create their own online sensorimotor control and learning experiments. As a proof-of-concept, we present three visuomotor rotation experiments conducted with this platform, asking if fundamental motor learning phenomena discovered in the lab could be reproduced online. In all experiments, there was a close correspondence between the results obtained online with those previously reported from research conducted in the laboratory. As such, our web-based motor learning platform can serve as a powerful tool to exploit the benefits of crowdsourcing approaches and extend research on motor learning beyond the confines of the traditional laboratory.

### Introduction

The ability to produce a wide repertoire of movements, and to adjust those movements in response to changes in the body and environment, is a core feature of human competence. This ability helps a tired ping-pong player compensate for her fatigue, and facilitates a patient's motor recovery from neurological injury (John W. Krakauer, Haggard, Xu, Wong, & Haith, 2019; Roemmich & Bastian, 2018; Jonathan S. Tsay & Winstein, 2020). By improving our understanding of how movements are learned, we can uncover general principles about how the motor system functions and develops, optimize training techniques for sport and rehabilitation, and design better brain-machine interfaces.

A paradigmatic approach for studying motor learning is to introduce a new mapping between the motion of the arm and the corresponding visual feedback (J. W. Krakauer, Pine, Ghilardi, & Ghez, 2000). Historically, such visuomotor perturbations were accomplished by the use of prism glasses that distort the visual field (Helmholtz, 1924). Nowadays, virtual reality setups allow more flexible control of the relationship between hand position and a feedback signal. A commonly used perturbation is visuomotor rotation. Here, participants reach to a visual target with vision of the arm occluded. Feedback is provided in the form of a cursor presented on a computer monitor. After a brief training period during which the feedback corresponds to the actual hand position, a perturbation is introduced by rotating the position of the cursor from the actual hand position (e.g., 15°). The mismatch between the expected and actual position of the feedback induces a change in the heading direction of the hand, with the hand moving in the opposite direction of the rotation and thus reducing the mismatch in subsequent trials. If the mismatch is small, this change will emerge in a gradual manner over trials and occurs outside the participant's awareness, a phenomenon known as implicit sensorimotor adaptation. If the mismatch is large, this adaptive learning process may also be accompanied by more explicit adjustments in aiming (Kim, Avraham, & Ivry, 2020; McDougle, Ivry, & Taylor, 2016; Shadmehr, Smith, & Krakauer, 2010).

Motor learning experiments are typically run in-person, exploiting finely calibrated apparatuses (digitizing tablets, robotic manipulandum, full VR displays, etc.) that provide data with high temporal and spatial resolution. However, these experiments come at a cost: Beyond the expenses associated with purchasing specialized equipment, the labor demands are high for recruiting participants and administering the experiment, especially since testing is usually limited to one participant at a time. In-person studies are also likely WEIRD (white, educated, industrialized, rich, and democratic), limiting the

57 generalizability of these research findings to the population writ large (Henrich, Heine, & Norenzayan, 2010). Moreover,  
58 exceptional circumstances that limit in-person testing, such as a global pandemic, may halt research progress (Fauci, Lane,  
59 & Redfield, 2020).

60  
61 Online experiments have been embraced across the social sciences as a powerful alternative approach for collecting data  
62 for behavioral experiments (Anwyl-Irvine, Massonnié, Flitton, Kirkham, & Evershed, 2020). Crowdsourcing platforms,  
63 such as Amazon Mechanical Turk (mturk.com) and Prolific (www.prolific.co), allow researchers to recruit a large number  
64 of participants, perform rapid pilot testing, and efficiently collect data using a variety of experimental designs. Compared  
65 to in-person studies, the online recruitment pool is likely to be more representative of the general population (Paolacci &  
66 Chandler, 2014). Online studies can also reach patient populations who have mobility deficits that limit their capability and  
67 willingness to come to the lab.

68  
69 Several studies have shown that the data obtained in online studies replicate those obtained from in-person studies (e.g.,  
70 Crump, McDonnell, & Gureckis, 2013). However, only a limited number of online studies have been performed in the  
71 domain of sensorimotor learning. The field of motor learning may have shied away from these online methods because of  
72 concerns related to the inherent loss of experimental control with online data collection, something that may be especially  
73 problematic for kinematic data. Not only will the response devices be variable, but it would be difficult to control how  
74 movements are produced between participants or even across the experimental session for a single participant. Previous  
75 efforts examining motor learning in the wild (Chen et al., 2018; Crocetta et al., 2018; Fernandes, Albert, & Kording, 2011;  
76 Haar, van Assel, & Faisal, 2020; John W. Krakauer et al., 2020; Takiyama & Shinya, 2016) have primarily focused on  
77 testing specific hypotheses in their ecological setup, making it hard to directly compare their findings with those obtained  
78 in the lab. Here we set out to create a general-purpose online platform that could be adopted by researchers for studying  
79 sensorimotor control and learning. We report a series of experiments with designs commonly used to study sensorimotor  
80 learning. We ask whether the data from our online studies replicate core phenomena reported in previous in-person studies.  
81 The platform, OnPoint, is available on GitHub (Jonathan Sanching Tsay, Lee, et al., 2020), and participants were recruited  
82 over Amazon's Mechanical Turk. The results show a close correspondence between the motor learning behavior observed  
83 in-person and online, validating our tool as a platform for motor learning research, and serving as a proof-of-concept to  
84 bring motor learning outside the confines of the traditional laboratory.

## Results

### *Experiment 1: Learning visuomotor rotation of different sizes*

Motor learning is frequently treated as an implicit phenomenon. Indeed, expert performers frequently comment on letting their “body do the thinking” when they execute an overlearned skill (Schmidt & Young, 1987). However, these experts are also able to make rapid and flexible motor corrections, suggesting that even when behavior seems automatic, there remains considerable cognitive control (Fitts & Posner, 1979). Recent work has highlighted how performance in even simple sensorimotor adaptation tasks reflects the operation of multiple learning processes that may solve different computational problems (Benson, Anguera, & Seidler, 2011; Diedrichsen, White, Newman, & Lally, 2010; Haith, Huberdeau, & Krakauer, 2015; Hegele & Heuer, 2010; Leow, Marinovic, de Rugy, & Carroll, 2018; Mazzoni & Krakauer, 2006; Miyamoto, Wang, & Smith, 2020; Taylor, Krakauer, & Ivry, 2014; Werner et al., 2015). One source of evidence for this comes from a study by Bond and Taylor (Bond & Taylor, 2015) who studied how people learn to respond when the visual feedback was rotated, and in particular, when the size of the rotation was manipulated between 15° and 90° (Figure 1a). Explicit strategies, as measured by verbal aim reports, were dominant when the error size was large, producing deviations in hand angle that scaled with the size of the perturbation. Yet, implicit adaptation, as measured by aftereffects during a no-feedback block that was introduced immediately after learning, remained constant over these perturbations.

Experiment 1 was designed to provide an online replication of Bond and Taylor (2015), testing whether the learning of visuomotor rotation – incorporating both explicit and implicit processes – scales with rotation size, and whether the aftereffect – reflecting solely the implicit process – remains constant across rotation sizes. After a series of baseline blocks to familiarize the participants with the apparatus and basic trial procedure, participants experienced one of four rotation sizes (15°, 30°, 60°, 90°), with the perturbation constant for an entire block of 80 rotation trials. Participants were instructed to make the cursor intersect the target; we did not specify if they should explicitly alter their aim to facilitate performance.

These learning functions are presented in Figure 1b (in-person, Bond and Taylor (2015)) and 1d (online version). We analyzed our data together with those obtained by Bond and Taylor (2015), evaluating mean performance at three phases of the experiment: Early adaptation, late adaptation, and aftereffect (Figures 1c and 1e). Learning scaled with the size of the rotation during early learning (main effect of perturbation size:  $F_{(1,136)} = 64.5, p < 0.01$ ), a signature of strategic aiming at play. While there was no main effect of setting ( $F_{(1,136)} = 0.5, p = 0.46$ ), adaptation scaled faster in the in-person group compared to the online group (setting x perturbation size interaction:  $F_{(1,136)} = 64.5, p < 0.01$ ). The mean angle during the late phase of adaptation in all conditions reached an asymptote close to the size of the perturbation. As such, learning scaled with the size of perturbation during the late phases of learning in both experiments ( $F_{(1,136)} = 810.1, p < 0.01$ ). There was neither a main effect of setting ( $F_{(1,136)} = 1.3, p = 0.24$ ) nor an interaction between setting x perturbation size ( $F_{(1,136)} = 0.37, p = 0.54$ ).

Hand angle dropped dramatically in the no-feedback aftereffect block, presumably due to the termination of aiming. However, the direction of the hand movements remained different than zero in the direction away from the feedback (all groups:  $p < 0.01$ ), the signature of an implicit aftereffect. Critically, the magnitude of the aftereffect did not scale with the size of the rotation ( $F_{(1,136)} = 2.5, p = 0.12$ ), indicating that implicit adaptation reaches a common saturation point, at least for the large range of values tested here. The magnitude of aftereffects was nominally similar to that reported in Bond and Taylor (2015) (main effect of setting:  $F_{(1,136)} = 1.9, p = 0.17$ ), with the size of the aftereffect ranging from 0° to 30°. There was no interaction between setting x perturbation size in aftereffects ( $F_{(1,136)} = 0.1, p = 0.75$ ).

While the data from our online study are similar to the results from Bond and Taylor (2015), there were several notable differences. First, within-participant variability was greater in the online group (In-person SD:  $12.4 \pm 1.3^\circ$ ; Online SD:  $19.0 \pm 1.5^\circ$ ;  $p < 0.01$ ). This may be due to the lack of stringent experimental supervision or differences in the types of movements used in the in-person study (arm movements in Bond and Taylor) and online study (likely wrist and/or finger movements given that most participants used a trackpad). Second, the online participants learned at a slower rate. This may be because participants in the in-person study were able to identify and implement an aiming strategy faster than those tested online. The lower variability for in-person movements is likely more conducive for identifying an appropriate strategy. Alternatively, it may be easier to strategically adjust the aim of natural arm movements compared to the aim of finer movements involving more distal joints over a trackpad.

139 Third, and unexpectedly, the aftereffect data for the online participants was non-monotonic: More variance was explained  
 140 by a quadratic model ( $R_{adj}^2 = 0.31, p < 0.01$ ) compared to a linear model ( $R_{adj}^2 = 0.04, p = 0.29$ ), an effect that was not  
 141 present in the Bond and Taylor (2015) data, where neither a linear ( $R_{adj}^2 = 0.06, p = 0.06$ ) or quadratic function  
 142 ( $Q: R_{adj}^2 = 0.05, p = 0.14$ ) accounted for a significant percentage of variance. The reason for the non-monotonicity in the  
 143 online data is unclear. The dip for the 90° group might reflect some sort of discounting by the implicit system of this large,  
 144 non-ecological error (Berniker & Kording, 2008, 2011; Körding et al., 2007; Wei & Körding, 2009). However, the  
 145 aftereffect for this group was similar to that observed for the group exposed to a 15° rotation, the condition in which strategic  
 146 aiming is unlikely to make much, if any contribution (Morehead, Qasim, Crossley, & Ivry, 2015). An alternative possibility  
 147 is that the aftereffect data for the 30° and 60° groups are artifactually inflated by some residual effect of the aiming strategy  
 148 in the no-feedback aftereffect block. For example, there may have been a hysteresis effect when re-establishing the mapping  
 149 required to move straight to the target when using a trackpad or mouse, an effect that was not present for the 90°. It is also  
 150 possible that the extent of implicit adaptation as measured in the aftereffect data does vary with error size, albeit in a non-  
 151 linear manner. We revisit this question using a different approach in Exp 2.

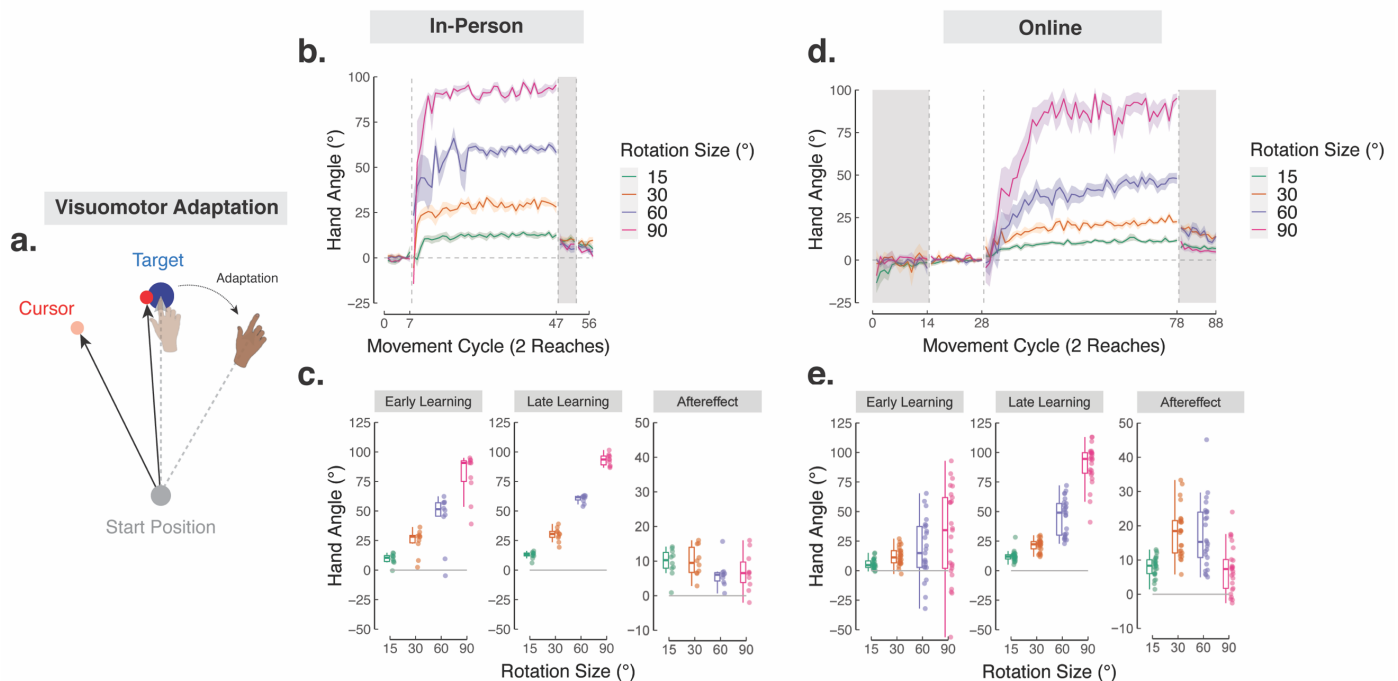

**Figure 1. Sensorimotor learning in response to visuomotor rotations.** (a) Schematic of a visuomotor rotation task. The cursor feedback (red dot) was rotated with respect to the movement direction of the hand, with the size of the rotation varied across groups (15°, 30°, 60°, or 90°). Translucent and solid colors display hand and cursor positions at early and late stages of learning, respectively. (b, d) Mean time courses of hand angle for 15° (green), 30° (yellow), 60° (purple), and 90° (pink) rotation conditions from the in-person experiment of Bond and Taylor (2015) and the online experiment. Hand angle is presented relative to the target (0°) during veridical feedback, no-feedback (grey background), and rotation trials. Shaded region denotes SEM. (c, e) Average hand angles during early and late phases of the rotation block, and during the no-feedback aftereffect block from the in-person (c) and online (e) experiments. Box plots denote the median (thick horizontal lines), quartiles (1<sup>st</sup> and 3<sup>rd</sup>, the edges of the boxes), and extrema (min and max, vertical thin lines). The data from each participant is shown as translucent dots.

## Experiment 2: Adaptation in response to non-contingent rotated visual feedback

153  
 154  
 155 In Experiment 2, we turn to a method designed to measure implicit learning in the absence of strategic aiming. Motivated  
 156 by the idea that adaptation is obligatory in response to a visual sensory prediction error, Morehead et al. (Morehead, Taylor,  
 157 Parvin, & Ivry, 2017) replaced the standard movement-contingent visual feedback cursor with a “visual clamp”. Here, the  
 158 cursor follows an invariant trajectory on all trials, with the radial position dependent on the participant’s hand position (as  
 159 in standard feedback), but the angular position always shifted from the target by a fixed angle (Figure 2a). In this manner,  
 160 the angular position of the cursor is no longer contingent on the participant’s movement. This manipulation, in combination  
 161 with instructions to ignore the cursor feedback and always move directly to the target, induces gradual changes in hand  
 162 angle away from the target in the direction opposite to the perturbation. Learning here is assumed to be entirely implicit,  
 163 verified in both subjective interviews provided by participants at the end of the experimental session (Kim, Morehead,  
 164 Parvin, Moazzezi, & Ivry, 2018; Kim, Parvin, & Ivry, 2019), as well as in reports of sensed hand location obtained on probe  
 165 trials throughout the adaptation block (Jonathan S. Tsay, Parvin, & Ivry, 2020).  
 166  
 167

168  
169 Given the assumption that learning is implicit, the clamp method provides another way to ask how error size influences  
170 implicit adaptation. Morehead et al (2017) demonstrated that the rate of adaptation is largely invariant over a wide range of  
171 error sizes (clamp angles ranging from 7.5° - 95°). Moreover, the asymptote has also been shown to be independent of the  
172 error size for this range of perturbations, averaging between 15° - 25° across several studies (Avraham, Keizman, &  
173 Shmuelof, 2019; Kim et al., 2018; Jonathan S. Tsay, Avraham, et al., 2020; Jonathan S. Tsay, Kim, Parvin, Stover, & Ivry,  
174 2020).

175  
176 Experiment 2 used a design based on a subset of the conditions in Morehead et al (2017). We examined adaptation in  
177 response to visual clamps of 7.5°, 15°, and 30°, with each perturbation tested in separate groups of participants as in  
178 Experiment 1. We also included a 0° condition, one in which the cursor feedback always moved directly to the target. This  
179 condition provides a baseline to ensure that changes in hand angle in the other groups are driven by error-based learning,  
180 rather than changes due to fatigue or proprioceptive drift (Brown, Rosenbaum, & Sainburg, 2003a, 2003b; Cameron, de la  
181 Malla, & López-Moliner, 2015; Wann & Ibrahim, 1992).

182  
183 These learning functions are presented in Figures 2b & 2d. We analyzed our data together with those obtained by Morehead  
184 et al (2017), evaluating mean performance at three phases of the experiment: Early adaptation, late adaptation, and  
185 aftereffect. As expected, there was no consistent change in performance in response to the 0° clamp in our data (one sample  
186 permutation test: early learning:  $p = 0.62$ ; late adaptation,  $p = 0.87$ ; aftereffects,  $p = 0.19$ ), similar to that observed in  
187 Morehead et al (2017) (one sample permutation test: early learning,  $p = 0.46$ ; late adaptation,  $p = 0.26$ ; aftereffects,  $p =$   
188  $0.82$ ). In contrast, adaptation was evident in all stages of learning for the non-zero clamps (one sample permutation test, all  
189  $p < 0.05$ ).

190  
191 For non-zero clamp sizes, adaptation did not scale with rotation size during early learning ( $F_{(1,86)} = 0.2, p = 0.66$ ), late  
192 learning ( $F_{(1,86)} = 0.0, p = 0.91$ ), and the no-feedback aftereffect block ( $F_{(1,86)} = 0.0, p = 0.96$ ) (Figures 2c and 2e). The  
193 functions for the 7.5°, 15°, and 30° clamps reach a common asymptote around 15°, with the range of values across  
194 individuals similar to that seen in the aftereffect data of Experiment 1. We note that the magnitude of adaptation is  
195 approximately twice that of the perturbation for the 7.5°. While this might seem puzzling, it is important to keep in mind  
196 that, unlike normal adaptation studies where the position of the feedback cursor is contingent on the hand movement and  
197 thus, the size of the visual error is reduced throughout adaptation, the error size remains invariant with the clamped feedback  
198 task and continues to drive adaptation. In terms of a comparison to in-person results, the online data were similar to those  
199 collected by Morehead et al. (no main effect of setting: Early,  $F_{(1,86)} = 0.8, p = 0.13$ ; Late,  $F_{(1,86)} = 0.2, p = 0.63$ ,  
200 Aftereffects,  $F_{(1,86)} = 0.0, p = 0.98$ ). Within-participant variability was again greater in the online group (In-person SD:  
201  $4.5 \pm 1.4^\circ$ ; Online SD:  $8.2 \pm 0.4^\circ$ ;  $p < 0.01$ ).

202  
203 In sum, these online results replicate two core insights that are derived from in-person studies using clamped feedback.  
204 First, implicit adaptation occurs automatically in response to a visual sensory prediction error. Second, the learning function  
205 is invariant across a large range of error sizes, both in the shape of the function and its asymptotic value. This invariance  
206 poses a challenge to the standard state-space model of sensorimotor adaptation where the rate and magnitude of learning  
207 are dependent on error size (Herzfeld, Vaswani, Marko, & Shadmehr, 2014; Marko, Haith, Harran, & Shadmehr, 2012;  
208 Shadmehr et al., 2010; Smith, Ghazizadeh, & Shadmehr, 2006). Thus, the current results add additional evidence pointing  
209 to the need for novel perspectives of adaptation, ones that do not assume adaptation to be sensitive to error size, but instead  
210 constrained by the limits of sensorimotor plasticity (Kim et al., 2018) or sensory biases (Heald, Lengyel, & Wolpert, 2020;  
211 Jonathan S. Tsay, Kim, et al., 2020).

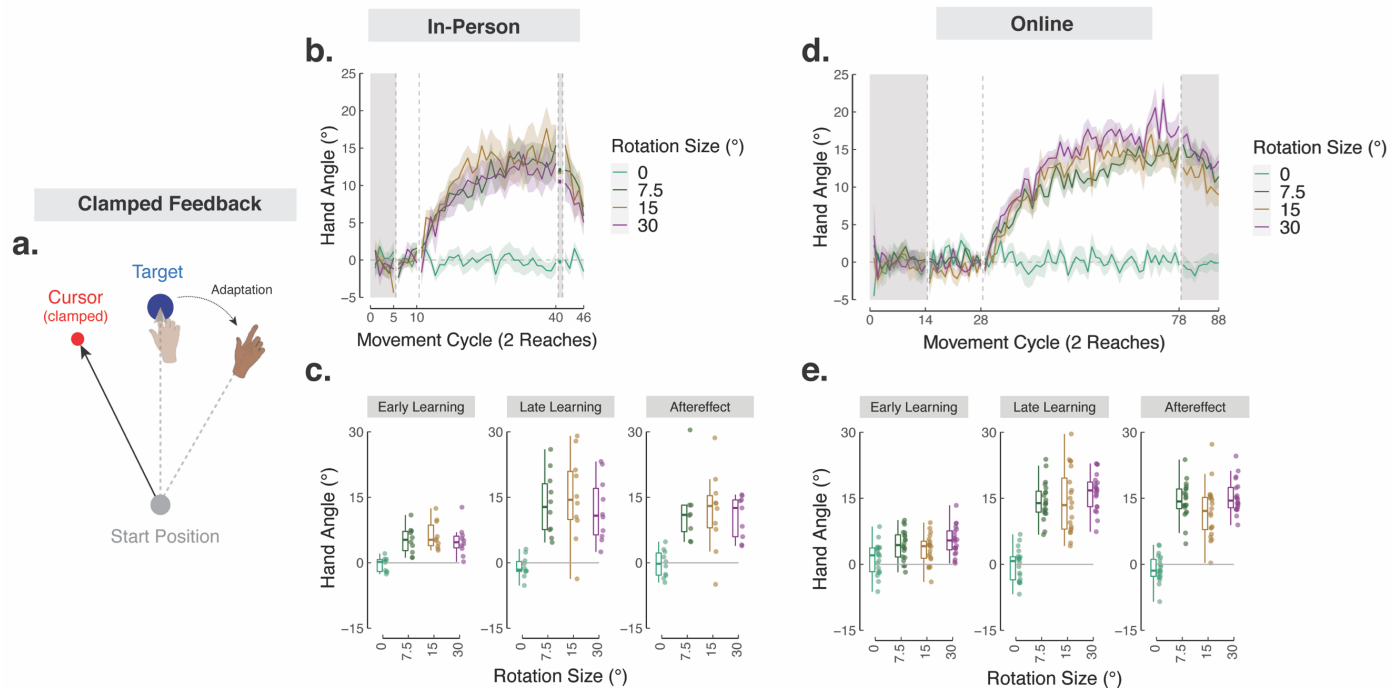

**Figure 2. Sensorimotor adaptation in response to non-contingent displaced visual feedback.** (a) Schematic of the clamped feedback task. The cursor feedback (red dot) follows a trajectory rotated relative to the target, independent of the position of the participant's hand. The rotation size remains invariant throughout the rotation block but varied across groups. Participants were instructed to move directly to the target (blue circle) and ignore the visual feedback. The translucent and solid colors display hand position early and late in learning, respectively. (b, d) Mean time courses of hand angle for 0° (green), 7.5° (dark green), 15° (brown), and 30° (dark purple) rotation conditions (in-person experiment, adapted from Morehead et al. 2017). Hand angle is presented relative to the target (0°) during no-feedback (dark grey background), veridical feedback, and rotation trials. Shaded region denotes SEM. (c, e) Average heading angles during early and late phases of the rotation block, and during the no-feedback aftereffect block from the in-person (c) and online (e) experiments. Box plots denote the median (thick horizontal lines), quartiles (1<sup>st</sup> and 3<sup>rd</sup>, the edges of the boxes), and extrema (min and max, vertical thin lines). The data from each participant is shown as translucent dots.

### Experiment 3: Adaptation in response to variable, non-contingent rotated visual feedback

The use of a fixed perturbation for each participant in Experiments 1 and 2 allowed us to assess the full learning curve and aftereffect. This design often lacks the power to identify subtle differences in sensitivity to error size because the standard methods of analysis involve smoothing the data over multiple trials and making comparisons between individuals (or across sessions if a repeated measures design is employed). An alternative approach to study the effect of error size on implicit adaptation is to use a random perturbation schedule, exposing each individual to a range of error sizes throughout the perturbation block. By including both clockwise and counterclockwise rotations, there is no cumulative measure of learning; rather, the analysis focuses on trial-to-trial changes in heading angle (Figure 3a) (Avraham et al., 2019; Hutter & Taylor, 2018; Körding & Wolpert, 2004; Marko et al., 2012; Jonathan S. Tsay, Avraham, et al., 2020; Wei & Körding, 2009, 2010). Even if the feedback is contingent on hand position, learning with this method is assumed to be entirely implicit since these trial-by-trial perturbations, if relatively small, fall within the window of variation that arises from motor noise (Avraham et al., 2019; Gaffin-Cahn, Hudson, & Landy, 2019). Variable perturbations can also be employed with non-contingent clamped feedback, with the instructions providing a way to ensure that the behavioral changes are automatic and implicit.

Following the in-person method used in Tsay et al (2020) (Jonathan Sanching Tsay, Haith, Ivry, & Kim, 2020), we varied the size of the non-contingent clamped feedback across trials. Each participant was exposed to a set of eight rotation sizes between 0 - 60°, with four of these involving clockwise rotations and the other four involving counterclockwise rotations of the same size. To sample a large range while keeping the experiment within 1 hour, participants received different sets of perturbations (total of four sets, see Methods). Given that the eight perturbations within a set have a mean of zero, there should be limited accumulated learning across trials. Similar to Experiment 2, participants were instructed to ignore the cursor feedback and always move directly to the target.

As a trial-by-trial measure of implicit adaptation, we averaged each participant's change in hand angle from trial  $n$  to trial  $n + 1$ , as a function of the rotation size on trial  $n$ . As can be seen in Figure 3c, the participants showed a sign-dependent change in hand angle in response to the clamped feedback, similar to that observed in the in-person study of Tsay et al. (Figure 3b, adapted from (Kasuga, Hirashima, & Nozaki, 2013; Kim et al., 2018; Ranjan & Smith, 2020; Jonathan S. Tsay,

Avraham, et al., 2020; Wei & Körding, 2009, 2010). The function is sublinear, composed of a quasi-linear zone for smaller perturbations (up to around  $16^\circ$ ) and a saturation range for larger perturbations; indeed, the data suggest that the size of the trial-by-trial change in hand angle may fall off for the largest perturbations. In both the online and in-person studies, the mean changes in hand angle fall within a similar range ( $\pm 2.5^\circ$ ).

To statistically evaluate these data, we first extracted the slope from each individual's learning function, asking whether this value was significantly less than 0. The slopes were significantly less than 0 for the online and in-person experiments (both  $p < 0.01$ ), confirming robust sign-dependent implicit adaptation. We then asked whether the learning functions were sublinear by comparing, for each individual, the slope when computed using all perturbation sizes to the slope when using only the small perturbations (in-person:  $0, \pm 4^\circ$ ; online: the smallest two rotation sizes in their set, maximum size =  $\pm 25^\circ$ ). If the function is sublinear, the absolute slope calculated using all of the rotation sizes should be smaller (less negative). The results indicated that the functions were sublinear in both sets of data (in-person,  $p = 0.01$ ; online,  $p = 0.02$ ).

In sum, the results of Experiment 3 show a striking correspondence to that obtained in-person using a near-identical design (Kasuga, Hirashima, & Nozaki, 2013; Kim et al., 2018; Ranjan & Smith, 2020; Jonathan S. Tsay, Avraham, et al., 2020; Wei & Körding, 2009, 2010). Moreover, the functions, both in shape and magnitude are quite similar to that reported in previous studies that have used a variable-sized perturbation to study implicit adaptation (Kasuga, Hirashima, & Nozaki, 2013; Kim et al., 2018; Ranjan & Smith, 2020; Jonathan S. Tsay, Avraham, et al., 2020; Wei & Körding, 2009, 2010).

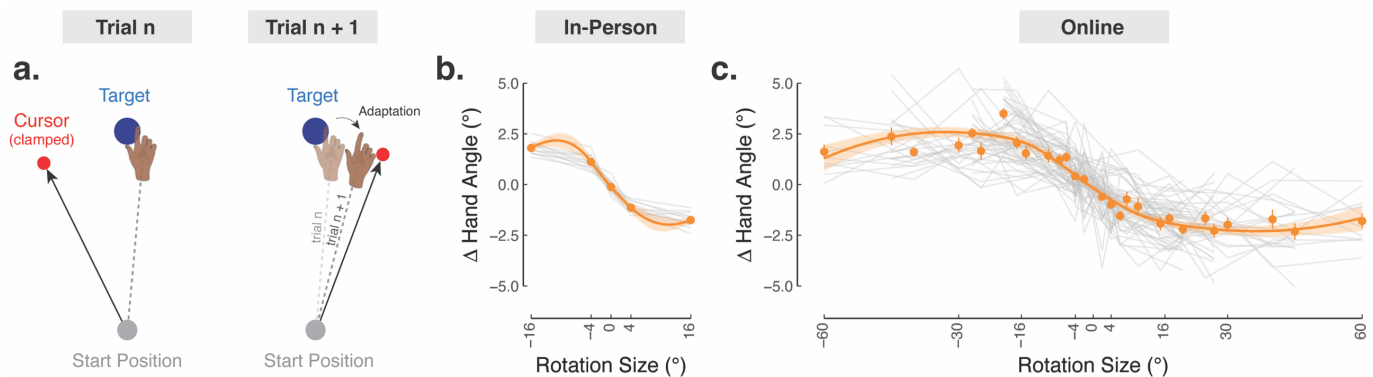

**Figure 3. Trial-by-trial estimates of sensorimotor adaptation in response to variable, non-contingent visual feedback. (a)** Schematic of the task. The cursor feedback (red dot) was rotated relative to the target, independent of the position of the participant's hand. The size of the rotation was varied randomly on a trial-by-trial basis. **(b, c)** The average change in hand angle from trial  $n$  to trial  $n + 1$  is plotted as a function of rotation size on trial  $n$ . Thin grey lines are individual data collected in-person (b) and online (c), with the best-fitting loess line indicated by the orange curve (shaded region denotes SEM). Orange points denote group means and bars denote SEM.

## Discussion

Bringing motor learning experiments online has considerable potential for providing researchers with a tool to collect data from large and diverse samples in an efficient and low-cost method. As a proof-of-concept, we report here three experiments examining behavioral changes in response to perturbed visual feedback, adopting established tasks for our online platform. Qualitatively, the results from these three on-line studies show a close correspondence with those obtained from in-person studies. Specifically, early and late learning scaled with the size of the rotation when both implicit and explicit processes were involved (Exp 1), but implicit adaptation was insensitive to error size across a large range of errors (7.5° - 90°, Exps 1 and 2). In a more granular analysis, size sensitivity was found for smaller errors (Exp 3). These results, in aggregate, demonstrate that online experiments provide a viable alternative to study sensorimotor adaptation outside the confines of the traditional laboratory setting.

These similarities between online and in-person experiments are especially striking in light of the many differences between online and in-person settings. Almost all of the participants in our study reported using a trackpad (see Methods).<sup>#</sup> Although we did not obtain detailed reports, we assume that their “reaching” movements here involved relatively small rotations about the wrist, perhaps coupled with extension of the index finger. These types of movements will entail a very different set of biomechanical and sensory constraints compared to reaches performed by moving along a digitizing tablet or when holding a robotic manipulandum (de Rugy, Hinder, Woolley, & Carson, 2009; Debats & Heuer, 2018; Hollerbach & Flash, 1982; Yin, Wang, Wei, & Körding, 2019). In-person experiments afford additional control, with the experimenter in a position to provide verbal instructions, answer questions, and supervise the participant to ensure the movement is performed as desired. This level of control is not possible with online studies where instructions are only given with on-screen messages and on-line monitoring is limited to feedback messages (e.g., “too far” or “too slow”).

Another limitation with online experiments is greater uncertainty concerning the temporal delay of the feedback (Anwyl-Irvine, Dalmaijer, Hodges, & Evershed, 2020). This can be a critical factor for studies of adaptation given the evidence showing that the rate of learning can fall off dramatically if the feedback is delayed, at least for endpoint feedback (Brudner, Kethidi, Graeupner, Ivry, & Taylor, 2016; Held, Efstathiou, & Greene, 1966; Kitazawa, Kohno, & Uka, 1995). We have observed this in our studies using clamped visual feedback. In our original study (Morehead, Taylor, Parvin, & Ivry, 2017), the common asymptote across different error sizes was ~15°. Subsequent to that study, we modified the code to reduce the feedback delay (from around 70 ms to 25 ms). Using this refined code, Kim et al. (2018) also observed a common asymptote in response to clamps of different sizes, but now the asymptotic values were ~25°. For this reason, we would urge caution in the use of online studies if the focus of the research is on absolute values such as the point of saturation. Concerns with temporal delays are mitigated for relative comparisons (such as the analyses presented here to compare conditions in the online studies).

In summary, online experiments provide a viable and novel way to test predictions about motor learning with large numbers of participants in a short amount of time. Whereas it would have taken months to collect the data reported here if the studies were run in-person, our online platform allowed us to collect these data in just a few days. Moreover, participants recruited online represent greater diversity, one that spans a range in terms of age, ethnicity, handedness, and years of education (see Participants) (Paolacci & Chandler, 2014). We do not envision online experiments replacing in-person testing in the domain of sensorimotor control and learning, since the laboratory affords the means to capture kinematic data with unparalleled precision. Nonetheless, many core phenomena central to our understanding of sensorimotor learning are robust and ripe for online investigation.

---

<sup>#</sup> Because there were too few mouse users in each experiment, we opted not add device (trackpad or mouse) as a factor in our analysis. However, in an unpublished study using a standard visuomotor rotation, we tested 435 individuals, 205 who reported using a trackpad and 225 who reported using a mouse (5 opted to not provide this information or used some other response device). There were no differences in measures of adaptation for the two groups.



## 304 **Methods**

### 305 *Participants*

306 The protocol was approved by the institutional review board at the University of California, Berkeley. Participants (n = 260;  
307 age range = 21 – 61, mean age  $\pm$  sd = 34.6  $\pm$  9.0) were recruited from the Amazon Mechanical Turk (AMT). Participants  
308 received financial compensation for their participation at an \$8 per hour rate. Recruitment was restricted to the United  
309 States. Based on the participants who completed an optional online survey (n = 180 out of 260 responded, 130 declined to  
310 participate in the survey), there were 100 male participants, 69 female participants, and 11 identified as other. 124 of the  
311 participants identified as White, 17 as Asian, 25 as African American, 1 as a Pacific-Islander, 2 as multi-racial, and 11  
312 declined to answer. 144 of the participants were right-handed, 22 left-handed, and 4 self-identified as ambidextrous. In  
313 terms of response devices, we encouraged participants to use a trackpad to limit variance from the device used. As a result,  
314 there were 154 trackpad users but only 16 mouse users (others opted not to provide this information). No statistical methods  
315 were used to determine the target sample sizes.

### 316 *Apparatus*

317 Participants used their own computer to access a dynamic webpage (HTML, JavaScript, and CSS) hosted on Google  
318 Firebase. The task progression was controlled by JavaScript code running locally in the participant's web browser. We  
319 assumed that monitor sampling rates were typically around 60 Hz, with little variation across computers (Anwyl-Irvine,  
320 Dalmaijer, et al., 2020). The size and position of stimuli were scaled based on each participant's screen size, which was  
321 automatically detected.

322 A package containing all the codes of the experiment can be accessed and downloaded from GitHub  
323 (<https://github.com/alan-s-lee/OnPoint>) and Gorilla (<https://gorilla.sc/openmaterials/111001>). We also provided a user  
324 manual to assist other researchers in setting up motor learning experiments at <https://tinyurl.com/y6k8fvkk>.

### 325 *Reaching Task Procedure*

326 The participant made reaching movements by moving the computer cursor with the trackpad or computer mouse. We did  
327 not obtain information concerning the monitors used by each participant (something corrected in on-going studies); as such,  
328 we cannot specify the size of the stimuli. However, from our experience in subsequent studies, we assume that most online  
329 participants are using a laptop computer. To provide a rough sense of the stimulation conditions, we assume that the typical  
330 monitor had a 13" screen with a width of 1366 pixels and height of 768 pixel (Anwyl-Irvine, Dalmaijer, et al., 2020). On  
331 each trial, the participants made a center-out planar movement from the center of the workspace to a visual target. The  
332 center position was indicated by a white circle (0.5 cm in diameter) and the target location was indicated by a blue circle  
333 (also 0.5 cm in diameter). The radial distance of the target from the start location was 6 cm. In experiments 1 and 2, the  
334 target could appear at one of two locations on an invisible virtual circle (45°: upper right quadrant; 135°: upper left quadrant).  
335 For these experiments, a movement cycle is defined as 2 consecutive reaches, one to each target. In Experiment 3, the target  
336 appeared in a single position at 45° throughout the entire experiment.

337 To initiate each trial, the participant moved the cursor, represented by a white dot on their screen (0.5 cm in diameter), into  
338 the start location. During this initialization phase, feedback was provided when the cursor was within 4 cm of the start circle.  
339 Once the participant maintained the cursor in the start position for 500 ms, the target appeared. The location of the target in  
340 Experiments 1 and 2 was selected in a pseudo-randomized manner. The participant was instructed to reach, attempting to  
341 rapidly "slice" through the target. The feedback cursor, when presented (see below) remained visible throughout the duration  
342 of the movement and remained fixed for 50 ms at the radial distance of the target when the movement amplitude reached 6  
343 cm. If the movement was not completed within 500 ms, the message "too slow" was displayed in red 20 pt. Times New  
344 Roman font at the center of the screen for 750 ms.

345 The feedback could take one of the following forms: veridical feedback, no-feedback, rotated contingent feedback (Exp. 1),  
346 and rotated non-contingent ("clamped") feedback (Exps. 2 and 3). During veridical feedback trials, the movement direction  
347 of the visual feedback was veridical with respect to the movement direction of the hand. During no-feedback trials, the  
348 feedback cursor was extinguished as soon as the hand left the start circle and remained off for the entire reach. The cursor  
349 only became visible during the return phase of the trial, when the cursor was within 4 cm of the start circle. With rotated  
350 contingent feedback, the cursor moved at an angular offset relative to the position of the hand; the radial position of the

360 cursor corresponded to that of the hand up to 6 cm, at which point, the cursor position was frozen for 500 ms before turning  
361 off. During rotated clamped-feedback trials, the cursor moved at a specified angular offset relative to the position of the  
362 target, regardless of the movement direction of the hand (“clamped feedback”); as with rotated contingent feedback, the  
363 radial position of the cursor corresponded to that of the hand.

### 364 *Experiment 1: Learning visuomotor rotation of different sizes*

365  
366  
367 AMT participants (N = 100) completed a visuomotor adaptation task consisting of four blocks of trials (178 trials total: 89  
368 trials x 2 targets): Baseline no-feedback block (28 trials), baseline feedback block (28 trials), rotated feedback block (100  
369 trials), and no-feedback aftereffect block (20 trials). During the rotation block, each participant was assigned one of four  
370 rotation sizes (15°, 30°, 60°, 90°; 25 participants/ group), with the direction of the rotation (clockwise or counterclockwise)  
371 counterbalanced across participants

372  
373 Prior to each baseline block, the instruction “Move directly to the target as fast and accurately as you can” appeared on the  
374 screen. Prior to the rotation block, a new instruction message was presented: “Your cursor will now be rotated by a certain  
375 amount. In order to continue hitting the target, you will have to aim away from the target.” Prior to the no-feedback  
376 aftereffect block, the participants were instructed “Move directly to the target as fast and accurately as you can.”

### 377 *Experiment 2: Adaptation in response to non-contingent rotated visual feedback*

378  
379  
380 A new sample of AMT participants (N = 80) completed a visuomotor adaptation task, with the same exact block structure  
381 as Experiment 1 (178 total trials). There was only one critical difference: Rotated, non-contingent feedback was used during  
382 the rotation block, with the clamp fixed at one of four angular offsets relative to the target (0°, 7.5°, 15°, 30°; 20  
383 participants/group). The direction of the non-zero clamps (clockwise or counterclockwise) was counterbalanced across  
384 participants.

385  
386 The instructions for baseline and no-feedback aftereffect blocks were identical to those used in Experiment 1. Prior to the  
387 rotation block, the instructions were modified to read: “The white cursor will no longer be under your control. Please ignore  
388 the white cursor and continue aiming directly towards the target.” To clarify the invariant nature of the clamped feedback,  
389 three demonstration trials were provided. On all three trials, the target appeared straight ahead (90° position) and the  
390 participant was told to reach to the left (demo 1), to the right (demo 2), and backward (demo 3). On all three of these  
391 demonstration trials, the cursor moved in a straight line, 90° offset from the target. In this way, the participant could see that  
392 the spatial trajectory of the cursor was unrelated to their own reach direction.

### 393 *Experiment 3: Adaptation in response to variable, non-contingent rotated visual feedback*

394  
395  
396 A new sample of AMT participants (N = 60) completed a visuomotor adaptation task consisting of four blocks of trials (255  
397 total trials): Baseline no-feedback block (5 trials), baseline feedback block (15 trials), rotated feedback block (230 trials),  
398 and no-feedback aftereffect block (5 trials). During the rotation block, the non-contingent feedback varied from trial to trial,  
399 both in direction (clockwise or counterclockwise) and angular offset. Participants were assigned one of four sets of rotation  
400 sizes (Set 1:  $\pm 2^\circ$ ,  $\pm 4^\circ$ ,  $\pm 6^\circ$ ,  $\pm 20^\circ$ ; Set 2:  $\pm 10^\circ$ ,  $\pm 25^\circ$ ,  $\pm 40^\circ$ ,  $\pm 60^\circ$ ; Set 3:  $\pm 7.5^\circ$ ,  $\pm 15^\circ$ ,  $\pm 30^\circ$ ,  $\pm 45^\circ$ ; Set 4:  $\pm 2^\circ$ ,  $\pm 4^\circ$ ,  $\pm 17^\circ$ ,  
401  $\pm 27^\circ$ ) where  $\pm$  indicates that the clamped feedback could be rotated clockwise (-) or counterclockwise (+). Given that eight  
402 perturbations within a set have a mean of zero, the accumulated learning across trials should be limited. The same  
403 demonstration trials (see Experiment 2) were included before the rotated clamped feedback block.

### 404 *Attention and Instruction Checks*

405  
406  
407 It can be difficult to verify if participants tested online fully attend to the task. To mitigate this issue, we sporadically  
408 instructed participants to make specific keypresses: “Press the letter “b” to proceed.” If participants failed the make an  
409 accurate keypress, the experiment was terminated. These attention checks were randomly introduced within the first 50  
410 trials of the experiment. We also wanted to verify that the participants understand the task, and in particular, understood in  
411 Experiments 2 and 3 that the angular position of the feedback was independent of the direction of their hand movement. To  
412 this end, we included one instruction check after the three demonstration trials: “Identify the correct statement. Press 'a': I  
413 will aim away from the target and ignore the white dot. Press 'b': I will aim directly towards the target location and ignore  
414 the white dot.” The experiment was terminated if participants failed to make an accurate keypress (i.e., “b”).

## *Data Analysis*

The primary dependent variable of reach performance was hand angle, defined as the angle of the hand relative to the target when movement amplitude reached 6 cm from the start position (i.e., angle between a line connecting the start position to the target and a line connecting the start position to the hand). To aid visualization, the hand angle values for the groups (or trials in Experiment 3) with counterclockwise rotations were flipped, such that a positive hand angle corresponds to an angle in the opposite direction of the rotated feedback, the direction expected to result from learning.

Outlier responses were defined as trials in which the hand angle deviated by more than 3 standard deviations from a moving 5-trial window. These outlier trials were excluded from further analysis since behavior on these trials could reflect attentional lapses or anticipatory movements to another target location (average percent of trials removed per participant: Experiment 1:  $2.0 \pm 1.0\%$  Experiment 2:  $1.5 \pm 1.1\%$  Experiment 3:  $1.0 \pm 0.7\%$ ).

Experiments 1 and 2: Data analysis mimicked the two studies we sought to replicate (Bond & Taylor, 2015; Morehead et al., 2017). The mean heading angle for each movement cycle was calculated and baseline subtracted to evaluate adaptation relative to idiosyncratic movement biases. Baseline was defined as the last 5 cycles of the vertical feedback baseline block (cycles 24 – 28). We evaluated three hand angle measures: early adaptation, late adaptation, and aftereffect. Early adaptation was operationalized as the average mean hand angle over cycles 31 – 35 (cycles 3-7 of the rotation block). Late adaptation was defined as the mean hand angle over cycles 64 – 68 (cycles 35 – 40 of the rotation block, mimicking Bond and Taylor, 2015; and Kim et al, 2018). The aftereffect was operationalized as the average mean angle over the first 5 cycles of the no-feedback aftereffect block (cycles 79 – 83).

All dependent measures were evaluated using an ANCOVA permutation test (R statistical packages: aovperm in the permuco package; 5000 permutations) as a more robust measure when the data is both normal and non-normally distributed (Lehmann and Romano 2008). Post-hoc pairwise permutation t-tests were performed (R statistical package: perm.t.test), and p values were Bonferroni correct to assess group differences.

Experiment 3: As our measure of trial-by-trial adaptation, we calculated the change in hand angle on trial  $n + 1$  as a function of the rotation size on trial  $n$  for each trial. Means were then calculated for each clamp size, averaging over the clockwise and counterclockwise perturbations for a given size. These mean data were submitted to a linear regression to extract each individual's slope (R statistical package: lm), with Rotation Size as the main effect. To ask whether these learning functions were sublinear, we compared each individual's slope computed with all four rotation sizes, against the slope computed with the two smallest rotation sizes in their set. If adaptation was sublinear, then the slopes computing using all rotation sizes would be smaller in absolute magnitudes (less negative) than the slope computed using only small rotation sizes.

**Author Contributions:** All authors contributed to the study design. Testing, data collection, and data analysis were performed by J.S.T. All authors drafted the manuscript and approved the final version of the manuscript for submission.

**Acknowledgements:** This work was supported by grants R35 NS116883, R01 NS105839, and R01 NS1058389 from the National Institutes of Health (NIH).

## References

- 154  
155 Anwyl-Irvine, A. L., Dalmaijer, E. S., Hodges, N., & Evershed, J. (2020). *Online Timing Accuracy and Precision: A*  
156 *comparison of platforms, browsers, and participant's devices*. doi:10.31234/osf.io/jfec
- 157 Anwyl-Irvine, A. L., Massonnié, J., Flitton, A., Kirkham, N., & Evershed, J. K. (2020). Gorilla in our midst: An online  
158 behavioral experiment builder. *Behavior Research Methods*, 52(1), 388–407.
- 159 Avraham, G., Keizman, M., & Shmuelof, L. (2020). Environmental Consistency Modulation of Error Sensitivity During  
160 Motor Adaptation is Explicitly Controlled. *Journal of Neurophysiology*. doi:10.1152/jn.00080.2019
- 161 Benson, B. L., Anguera, J. A., & Seidler, R. D. (2011). A spatial explicit strategy reduces error but interferes with  
162 sensorimotor adaptation. *Journal of Neurophysiology*, 105(6), 2843–2851.
- 163 Berniker, M., & Kording, K. (2008). Estimating the sources of motor errors for adaptation and generalization. *Nature*  
164 *Neuroscience*, 11(12), 1454–1461.
- 165 Berniker, M., & Kording, K. P. (2011). Estimating the relevance of world disturbances to explain savings, interference and  
166 long-term motor adaptation effects. *PLoS Computational Biology*, 7(10), e1002210.
- 167 Bond, K. M., & Taylor, J. A. (2015). Flexible explicit but rigid implicit learning in a visuomotor adaptation task. *Journal*  
168 *of Neurophysiology*, 113(10), 3836–3849.
- 169 Brown, L. E., Rosenbaum, D. A., & Sainburg, R. L. (2003a). Limb position drift: implications for control of posture and  
170 movement. *Journal of Neurophysiology*, 90(5), 3105–3118.
- 171 Brown, L. E., Rosenbaum, D. A., & Sainburg, R. L. (2003b). Movement speed effects on limb position drift. *Experimental*  
172 *Brain Research. Experimentelle Hirnforschung. Experimentation Cerebrale*, 153(2), 266–274.
- 173 Brudner, S. N., Kethidi, N., Graeupner, D., Ivry, R. B., & Taylor, J. A. (2016). Delayed feedback during sensorimotor  
174 learning selectively disrupts adaptation but not strategy use. *Journal of Neurophysiology*, 115(3), 1499–1511.
- 175 Cameron, B. D., de la Malla, C., & López-Moliner, J. (2015). Why do movements drift in the dark? Passive versus active  
176 mechanisms of error accumulation. *Journal of Neurophysiology*, 114(1), 390–399.
- 177 Chen, X., Rutledge, R. B., Brown, H. R., Dolan, R. J., Bestmann, S., & Galea, J. M. (2018). Age-dependent Pavlovian  
178 biases influence motor decision-making. *PLoS Computational Biology*, 14(7), e1006304.
- 179 Crocetta, T. B., de Araújo, L. V., Guarnieri, R., Massetti, T., Ferreira, F. H. I. B., de Abreu, L. C., & de Mello Monteiro, C.  
180 B. (2018). Virtual reality software package for implementing motor learning and rehabilitation experiments. *Virtual*  
181 *Reality*, 22(3), 199–209.

- Crump, M. J. C., McDonnell, J. V., & Gureckis, T. M. (2013). Evaluating Amazon's Mechanical Turk as a tool for experimental behavioral research. *PloS One*, 8(3), e57410.
- de Rugy, A., Hinder, M. R., Woolley, D. G., & Carson, R. G. (2009). The synergistic organization of muscle recruitment constrains visuomotor adaptation. *Journal of Neurophysiology*, 101(5), 2263–2269.
- Debats, N. B., & Heuer, H. (2018). Sensory integration of movements and their visual effects is not enhanced by spatial proximity. *Journal of Vision*, 18(11), 15.
- Diedrichsen, J., White, O., Newman, D., & Lally, N. (2010). Use-dependent and error-based learning of motor behaviors. *The Journal of Neuroscience: The Official Journal of the Society for Neuroscience*, 30(15), 5159–5166.
- Fauci, A. S., Lane, H. C., & Redfield, R. R. (2020). [Review of *Covid-19 - navigating the uncharted*]. *The New England journal of medicine*, 382(13), 1268–1269. Massachusetts Medical Society.
- Fernandes, H. L., Albert, M. V., & Kording, K. P. (2011). Measuring generalization of visuomotor perturbations in wrist movements using mobile phones. *PloS One*, 6(5), e20290.
- Fitts, P. M., & Posner, M. I. (1979). *Human performance*. Greenwood Press.
- Gaffin-Cahn, E., Hudson, T. E., & Landy, M. S. (2019). Did I do that? Detecting a perturbation to visual feedback in a reaching task. *Journal of Vision*, 19(1), 5.
- Haar, S., van Assel, C. M., & Faisal, A. A. (2020). Motor learning in real-world pool billiards. *Scientific Reports*, 10(1), 20046.
- Haith, A. M., Huberdeau, D. M., & Krakauer, J. W. (2015). The influence of movement preparation time on the expression of visuomotor learning and savings. *The Journal of Neuroscience: The Official Journal of the Society for Neuroscience*, 35(13), 5109–5117.
- Heald, J. B., Lengyel, M., & Wolpert, D. M. (2020). Contextual inference underlies the learning of sensorimotor repertoires (p. 2020.11.23.394320). doi:10.1101/2020.11.23.394320
- Hegele, M., & Heuer, H. (2010). Implicit and explicit components of dual adaptation to visuomotor rotations. *Consciousness and Cognition*, 19(4), 906–917.
- Held, R., Efstathiou, A., & Greene, M. (1966). Adaptation to displaced and delayed visual feedback from the hand. *Journal of Experimental Psychology*, 72(6), 887–891.
- Helmholtz, H. L. F. V. (1924). *Treatise on physiological optics*. New York, NY: Dover Publications.

- 509 Henrich, J., Heine, S. J., & Norenzayan, A. (2010). The weirdest people in the world? *The Behavioral and Brain Sciences*,  
510 33(2–3), 61–83; discussion 83-135.
- 511 Herzfeld, D. J., Vaswani, P. A., Marko, M. K., & Shadmehr, R. (2014). A memory of errors in sensorimotor learning.  
512 *Science*, 345(6202), 1349–1353.
- 513 Hollerbach, M. J., & Flash, T. (1982). Dynamic interactions between limb segments during planar arm movement.  
514 *Biological Cybernetics*, 44(1), 67–77.
- 515 Hutter, S. A., & Taylor, J. A. (2018). Relative sensitivity of explicit re-aiming and implicit motor adaptation (p. 308510).  
516 doi:10.1101/308510
- 517 Kasuga, S., Hirashima, M., & Nozaki, D. (2013). Simultaneous processing of information on multiple errors in visuomotor  
518 learning. *PloS One*, 8(8), e72741.
- 519 Kim, H. E., Avraham, G., & Ivry, R. B. (2020). The Psychology of Reaching: Action Selection, Movement Implementation,  
520 and Sensorimotor Learning. *Annual Review of Psychology*. doi:10.1146/annurev-psych-010419-051053
- 521 Kim, H. E., Morehead, J. R., Parvin, D. E., Moazzezi, R., & Ivry, R. B. (2018). Invariant errors reveal limitations in motor  
522 correction rather than constraints on error sensitivity. *Communications Biology*, 1, 19.
- 523 Kim, H. E., Parvin, D. E., & Ivry, R. B. (2019). The influence of task outcome on implicit motor learning. *ELife*, 8.  
524 doi:10.7554/eLife.39882
- 525 Kitazawa, S., Kohno, T., & Uka, T. (1995). Effects of delayed visual information on the rate and amount of prism adaptation  
526 in the human. *The Journal of Neuroscience: The Official Journal of the Society for Neuroscience*, 15(11), 7644–  
527 7652.
- 528 Körding, K. P., Beierholm, U., Ma, W. J., Quartz, S., Tenenbaum, J. B., & Shams, L. (2007). Causal inference in  
529 multisensory perception. *PloS One*, 2(9), e943.
- 530 Körding, K. P., & Wolpert, D. M. (2004). Bayesian integration in sensorimotor learning. *Nature*, 427(6971), 244–247.
- 531 Krakauer, J. W., Pine, Z. M., Ghilardi, M. F., & Ghez, C. (2000). Learning of visuomotor transformations for vectorial  
532 planning of reaching trajectories. *The Journal of Neuroscience: The Official Journal of the Society for*  
533 *Neuroscience*, 20(23), 8916–8924.
- 534 Krakauer, John W., Hadjiosif, A. M., Xu, J., Wong, A. L., & Haith, A. M. (2019). Motor Learning. *Comprehensive*  
535 *Physiology*, 9(2), 613–663.

- 536 Krakauer, John W., Kitago, T., Goldsmith, J., Ahmad, O., Roy, P., Stein, J., ... Luft, A. (2020). Comparing a novel  
537 neuroanimation experience to conventional therapy for high-dose, intensive upper-limb training in subacute stroke:  
538 The SMARTS2 randomized trial. doi:10.1101/2020.08.04.20152538
- 539 Leow, L.-A., Marinovic, W., de Rugy, A., & Carroll, T. J. (2018). Task errors contribute to implicit aftereffects in  
540 sensorimotor adaptation. *The European Journal of Neuroscience*, 48(11), 3397–3409.
- 541 Marko, M. K., Haith, A. M., Harran, M. D., & Shadmehr, R. (2012). Sensitivity to prediction error in reach adaptation.  
542 *Journal of Neurophysiology*, 108(6), 1752–1763.
- 543 Mazzoni, P., & Krakauer, J. W. (2006). An implicit plan overrides an explicit strategy during visuomotor adaptation. *The*  
544 *Journal of Neuroscience: The Official Journal of the Society for Neuroscience*, 26(14), 3642–3645.
- 545 McDougale, S. D., Ivry, R. B., & Taylor, J. A. (2016). Taking Aim at the Cognitive Side of Learning in Sensorimotor  
546 Adaptation Tasks. *Trends in Cognitive Sciences*, 20(7), 535–544.
- 547 Miyamoto, Y. R., Wang, S., & Smith, M. A. (2020). Implicit adaptation compensates for erratic explicit strategy in human  
548 motor learning. *Nature Neuroscience*, 23(3), 443–455.
- 549 Morehead, J. R., Qasim, S. E., Crossley, M. J., & Ivry, R. (2015). Savings upon Re-Aiming in Visuomotor Adaptation. *The*  
550 *Journal of Neuroscience: The Official Journal of the Society for Neuroscience*, 35(42), 14386–14396.
- 551 Morehead, J. R., Taylor, J. A., Parvin, D. E., & Ivry, R. B. (2017). Characteristics of Implicit Sensorimotor Adaptation  
552 Revealed by Task-irrelevant Clamped Feedback. *Journal of Cognitive Neuroscience*, 29(6), 1061–1074.
- 553 Paolacci, G., & Chandler, J. (2014). Inside the Turk: Understanding Mechanical Turk as a Participant Pool. *Current*  
554 *Directions in Psychological Science*, 23(3), 184–188.
- 555 Ranjan, T., & Smith, M. (2020, October 21). *Implicit motor adaptation is driven by motor performance prediction error*  
556 *rather than sensory prediction error*. Presented at the Motor Control and Motor Learning.
- 557 Roemmich, R. T., & Bastian, A. J. (2018). Closing the Loop: From Motor Neuroscience to Neurorehabilitation. *Annual*  
558 *Review of Neuroscience*, 41, 415–429.
- 559 Schmidt, R. A., & Young, D. E. (1987). Transfer of movement control in motor skill learning. *Transfer of Learning:*  
560 *Contemporary Research and Applications.*, 281, 47–79.
- 561 Shadmehr, R., Smith, M. A., & Krakauer, J. W. (2010). Error correction, sensory prediction, and adaptation in motor control.  
562 *Annual Review of Neuroscience*, 33, 89–108.

- 563 Smith, M. A., Ghazizadeh, A., & Shadmehr, R. (2006). Interacting adaptive processes with different timescales underlie  
564 short-term motor learning. *PLoS Biology*, 4(6), e179.
- 565 Takiyama, K., & Shinya, M. (2016). Development of a Portable Motor Learning Laboratory (PoMLab). *PloS One*, 11(6),  
566 e0157588.
- 567 Taylor, J. A., Krakauer, J. W., & Ivry, R. B. (2014). Explicit and implicit contributions to learning in a sensorimotor  
568 adaptation task. *The Journal of Neuroscience: The Official Journal of the Society for Neuroscience*, 34(8), 3023–  
569 3032.
- 570 Tsay, Jonathan S., Avraham, G., Kim, H. E., Parvin, D. E., Wang, Z., & Ivry, R. B. (2020). The Effect of Visual Uncertainty  
571 on Implicit Motor Adaptation. *Journal of Neurophysiology*. doi:10.1152/jn.00493.2020
- 572 Tsay, Jonathan S., Kim, H. E., Parvin, D. E., Stover, A. R., & Ivry, R. B. (2020). Individual differences in proprioception  
573 predict the extent of implicit sensorimotor adaptation (p. 2020.10.03.324855). doi:10.1101/2020.10.03.324855
- 574 Tsay, Jonathan S., Parvin, D. E., & Ivry, R. B. (2020). Continuous reports of sensed hand position during sensorimotor  
575 adaptation. *Journal of Neurophysiology*, 124(4), 1122–1130.
- 576 Tsay, Jonathan S., & Winstein, C. J. (2020). Five Features to Look for in Early-Phase Clinical Intervention Studies.  
577 *Neurorehabilitation and Neural Repair*, 1545968320975439.
- 578 Tsay, Jonathan Sanching, Haith, A., Ivry, R., & Kim, H. (2020). *Distinct Processing of Task Error and Sensory Prediction*  
579 *Error during Motor Adaptation*. Presented at the Motor Learning and Motor Control.
- 580 Tsay, Jonathan Sanching, Lee, A. S., Avraham, G., Parvin, D. E., Ho, J., Boggess, M., ... Ivry, R. (2020). OnPoint: A  
581 package for online experiments in motor control and motor learning. doi:10.31234/osf.io/hwmpy
- 582 Wann, J. P., & Ibrahim, S. F. (1992). Does limb proprioception drift? *Experimental Brain Research. Experimentelle*  
583 *Hirnforschung. Experimentation Cerebrale*, 91(1), 162–166.
- 584 Wei, K., & Körding, K. (2009). Relevance of error: what drives motor adaptation? *Journal of Neurophysiology*, 101(2),  
585 655–664.
- 586 Wei, K., & Körding, K. (2010). Uncertainty of feedback and state estimation determines the speed of motor adaptation.  
587 *Frontiers in Computational Neuroscience*, 4, 11.
- 588 Werner, S., van Aken, B. C., Hulst, T., Frens, M. A., van der Geest, J. N., Strüder, H. K., & Donchin, O. (2015). Awareness  
589 of sensorimotor adaptation to visual rotations of different size. *PloS One*, 10(4), e0123321.



590 Yin, C., Wang, H., Wei, K., & Körding, K. P. (2019). Sensorimotor priors are effector dependent. *Journal of*  
591 *Neurophysiology*, 122(1), 389–397.
